# Supplementary material
Source: PubMed Central journal article supplement (PMC8483886)
Supplement: NIHMS1628799-supplement-1628799_Supp_Tab1-4.pdf [file NIHMS1628799-supplement-1628799_Supp_Tab1-4.pdf]

## Supplemental Tables

Supplemental Table 1

|                                                                            | Univariate OR with Diabetes<br>(95% CI) | p-value |
|----------------------------------------------------------------------------|-----------------------------------------|---------|
| <b>Model 1 Variables: Age</b> (n=11,313)                                   |                                         |         |
| Age, years                                                                 | 1.04 (1.04–1.05)                        | <0.001  |
| DNN Score, per SD                                                          | 3.02 (2.75–3.33)                        | <0.001  |
| <b>Model 2 Variables: Age, gender and race</b> (n=7,851)                   |                                         |         |
| Age, years                                                                 | 1.04 (1.04–1.05)                        | <0.001  |
| Gender                                                                     |                                         | 0.113   |
| Males                                                                      | Ref.                                    |         |
| Females                                                                    | 0.86 (0.71 – 1.04)                      | 0.113   |
| <b>Race/Ethnicity</b>                                                      |                                         |         |
| Non-Hispanic White, n (%)                                                  | Ref.                                    | -       |
| Black or African American, n (%)                                           | 1.68 (1.01–2.80)                        | 0.047   |
| Hispanic, Latino or Spanish origin/ancestry, n (%)                         | 0.59 (0.41 – 0.87)                      | 0.007   |
| Asian, n (%)                                                               | 1.40 (0.99 – 1.98)                      | 0.059   |
| Multi-ethnic, n (%)                                                        | 1.17 (0.72 – 1.88)                      | 0.532   |
| Other, n (%)                                                               | 0.78 (0.40 – 1.55)                      | 0.482   |
| DNN Score, per SD                                                          | 3.03 (2.69 – 3.41)                      | <0.001  |
| <b>Model 3 Variables: Age, gender, race and BMI</b> (n=1,033)              |                                         |         |
| Age, years                                                                 | 1.03 (1.02 – 1.05)                      | <0.001  |
| <b>Gender</b>                                                              |                                         |         |
| Males                                                                      | Ref.                                    |         |
| Females                                                                    | 0.69 (0.43 – 1.11)                      | 0.112   |
| <b>Race</b>                                                                |                                         |         |
| Non-Hispanic White                                                         | Ref.                                    |         |
| Black or African American                                                  | 0.65 (0.09 – 4.96)                      | 0.678   |
| Hispanic, Latino or Spanish origin or ancestry                             | 0.84 (0.33 – 2.15)                      | 0.713   |
| Asian or Pacific Islander                                                  | 1.73 (0.65 – 4.58)                      | 0.271   |
| Multi-ethnic                                                               | 0.48 (0.15 – 1.57)                      | 0.225   |
| Other/prefer not to disclose                                               | 0 (0)                                   | 0.999   |
| BMI                                                                        | 1.13 (1.09 – 1.16)                      | <0.001  |
| DNN Score, per SD                                                          | 2.50 (1.92 – 3.26)                      | <0.001  |
| <b>Model 4 Variables: Heart Rate and Heart Rate Variability</b> (n=11,313) |                                         |         |
| HR, bpm                                                                    | 1.02 (1.01–1.02)                        | <0.001  |
| HRV–RMSSD, per 10 ms                                                       | 0.97 (0.95 – 1.00)                      | 0.005   |

|                                                    |                     |        |
|----------------------------------------------------|---------------------|--------|
| DNN Score, per SD                                  | 3.02 (2.75 – 3.33)  | <0.001 |
| <b>Model 5 Variables: Comorbidities (n=11,313)</b> |                     |        |
| Hypertension, n (%)                                | 6.27 (5.35 – 7.34)  | <0.001 |
| Hypercholesterolemia, n (%)                        | 4.52 (3.88 – 5.26)  | <0.001 |
| Coronary artery disease, n (%)                     | 4.42 (3.65 – 5.34)  | <0.001 |
| Prior MI, n (%)                                    | 4.89 (3.81 – 6.27)  | <0.001 |
| CHF, n (%)                                         | 7.76 (5.85 – 10.29) | <0.001 |
| PVD, n (%)                                         | 6.41 (4.73 – 8.69)  | <0.001 |
| Prior Stroke, n (%)                                | 5.03 (3.86 – 6.55)  | <0.001 |
| Sleep apnea n (%)                                  | 3.83 (3.25 – 4.51)  | <0.001 |
| DNN Score, per SD                                  | 3.02 (2.75 – 3.33)  | <0.001 |

**Supplemental Table 1: Univariate odds ratios of predictors for prevalent diabetes in the Test Dataset.** Model numbers shown correspond to LogReg Models from Table 2. Univariate logistic regression models are then performed within the subgroup of the Test Dataset individuals that have all variables available. Subgroup sample sizes are shown and are the same as those from LogReg Models in Table 2. Sample sizes reported indicate individual people. Abbreviations: LogReg: logistic regression; OR: diagnostic odds-ratio; BMI: body mass index; CI: Confidence Interval; DNN: Deep neural network; SD: standard deviation; AUC: area under the receiver operating characteristic curve; HR: Heart Rate; HRV: Heart Rate Variability; RMSSD: Root Mean Square of Successive RR interval differences; y: years. Independent variables were standardized using the Z-score. †p-value is calculated using the Wald test for the odds ratio (two-sided).

**Supplemental Table 2**

|                                                    | <b>Positive DNN<br/>Score *</b><br><b>(n = 4,214)</b> | <b>Negative DNN<br/>Score *</b><br><b>(n = 7,099)</b> | <b>p-value</b> |
|----------------------------------------------------|-------------------------------------------------------|-------------------------------------------------------|----------------|
| Age, years, mean ± SD                              | 54.9±13.3                                             | 39.8±13.1                                             | <0.001         |
| <b>Gender</b>                                      | <i>N=2,551</i>                                        | <i>N=5,248</i>                                        |                |
| Females, n (%)                                     | 1,511 (56.1%)                                         | 2,002 (42.7%)                                         | <0.001         |
| Males, n (%)                                       | 1,511 (43.9%)                                         | 3,023 (57.3%)                                         |                |
| <b>Race and ethnic group</b>                       | <i>N=2,826</i>                                        | <i>N=5,025</i>                                        | <0.001         |
| Non-Hispanic White, n (%)                          | 2,187 (77.9%) <sup>a</sup>                            | 3,756 (74.9%) <sup>b</sup>                            |                |
| Black or African American, n (%)                   | 94 (3.4%) <sup>a</sup>                                | 80 (1.8%) <sup>b</sup>                                |                |
| Hispanic, Latino or Spanish origin/ancestry, n (%) | 237 (8.3%) <sup>a</sup>                               | 579 (2.1%) <sup>b</sup>                               |                |
| Asian, n (%)                                       | 155 (4.7%) <sup>a</sup>                               | 304 (6.2%) <sup>a</sup>                               |                |
| Multi-ethnic, n (%)                                | 92 (3.6%) <sup>a</sup>                                | 180 (11.0%) <sup>a</sup>                              |                |
| Other, n (%)                                       | 61 (1.8%) <sup>a</sup>                                | 126 (3.2%) <sup>a</sup>                               |                |
| <b>Waveform data</b>                               |                                                       |                                                       |                |
| Number of recordings per user, mean ± SD           | 51.3±100.7                                            | 46.0±88.6                                             | 0.004          |
| Duration of waveform, seconds, mean ± SD           | 21.9±10.5                                             | 21.9±10.6                                             | 0.776          |
| Heart rate, bpm, mean ± SD                         | 84.3±13.5                                             | 78.5±15.6                                             | <0.001         |
| <b>Anthropometric data</b>                         | <i>N=450</i>                                          | <i>N=715</i>                                          |                |
| Height, meters, mean ± SD                          | 1.72±0.11                                             | 1.74±0.10                                             | <0.001         |
| Weight, kg, mean ± SD                              | 87.0±22.0                                             | 82.4±20.2                                             | <0.001         |
| BMI, mean ± SD                                     | 29.4±6.6                                              | 27.1±5.9                                              | <0.001         |
| <b>Medical conditions</b>                          | <i>N=4214</i>                                         | <i>N=7099</i>                                         |                |
| No reported medical conditions, n (%)              | 1291 (30.6%)                                          | 4,458 (62.7%)                                         | <0.001         |
| Diabetes mellitus, n (%)                           | 562 (13.3%)                                           | 188 (2.6%)                                            | <0.001         |
| Hypertension, n (%)                                | 1,805 (42.8%)                                         | 1,195 (16.8%)                                         | <0.001         |
| Hypercholesterolemia, n (%)                        | 1,783 (42.3%)                                         | 1,373 (19.3%)                                         | <0.001         |
| Coronary artery disease, n (%)                     | 515 (12.2%)                                           | 285 (4.0%)                                            | <0.001         |
| Prior MI, n (%)                                    | 263 (6.2%)                                            | 114 (1.6%)                                            | <0.001         |
| CHF, n (%)                                         | 171 (4.1%)                                            | 63 (0.9%)                                             | <0.001         |
| PVD, n (%)                                         | 144 (3.4%)                                            | 68 (1.0%)                                             | <0.001         |
| Prior Stroke, n (%)                                | 210 (4.9%)                                            | 115 (1.6%)                                            | <0.001         |
| Sleep apnea n (%)                                  | 841 (20.0%)                                           | 626 (8.8%)                                            | <0.001         |

**Supplemental Table 2. Group differences between users with positive vs negative DNN Score for Diabetes in the Test Dataset.** Test Dataset sample size was 11,313 individual people. Where data was only available for subgroups of the full cohort, subgroup sample size is denoted by N. Differences in means of continuous variables between 2 groups were compared using the two-sample t-test. Differences in proportions of categorical variables

between 2 groups were compared using the Chi-Squared test. Tests of significance were 2 sided; no adjustments were made for multiple comparisons. Abbreviations: SD: standard deviation; BMI: body mass index; CAD: Coronary artery disease; CHF: Congestive heart failure; COPD: Chronic obstructive pulmonary disease; HR: Heart rate, MI: Myocardial Infarction; PVD: Peripheral Vascular Disease; s: seconds; bpm: beats per minute. <sup>a, b</sup>: Each subscript letter denotes a subset of dataset categories whose column proportions do not differ significantly from each other at the 0.05 level. \*The DNN Score was considered positive for diabetes if the value was  $\geq 0.427$ . This value was chosen because it maximizes the sensitivity between diabetes/no-diabetes in our training set.

**Supplemental Table 3**

|                                                    | <b>With Diabetes<br/>(n = 679)</b> | <b>Without Diabetes<br/>(n = 7,127)</b> | <b>p-value</b> |
|----------------------------------------------------|------------------------------------|-----------------------------------------|----------------|
| Age, years, mean ± SD                              | 54.4±14.3                          | 43.6±16.1                               | <0.001         |
| <b>Gender</b>                                      | <i>N=318</i>                       | <i>N=3,618</i>                          |                |
| Females, n (%)                                     | 152 (47.7%)                        | 2,085 (57.6%)                           | <0.001         |
| Males, n (%)                                       | 166 (52.2%)                        | 1,533 (21.5%)                           |                |
| <b>Race and ethnic group</b>                       | <i>N=318</i>                       | <i>N=3,618</i>                          |                |
| Non-Hispanic White, n (%)                          | 229 (72.0%)                        | 2,731 (75.4%)                           |                |
| Black or African American, n (%)                   | 15 (4.7%)                          | 92 (2.5%)                               |                |
| Hispanic, Latino or Spanish origin/ancestry, n (%) | 37 (11.6%)                         | 419 (11.5%)                             | 0.226          |
| Asian, n (%)                                       | 14 (4.4%)                          | 169 (4.7%)                              |                |
| Multi-ethnic, n (%)                                | 11 (3.5%)                          | 108 (3.0%)                              |                |
| Other, n (%)                                       | 12 (3.7%)                          | 99 (2.7%)                               |                |
| <b>Anthropometric data</b>                         | <i>N=56</i>                        | <i>N= 594</i>                           |                |
| Height, meters                                     | 1.72±0.12                          | 1.71±0.10                               | 0.310          |
| Weight, kg                                         | 98.2±53.3                          | 81.2±21.0                               | <0.001         |
| BMI                                                | 33.1±6.6                           | 27.7±6.5                                | <0.001         |
| <b>Waveform data</b>                               | <i>N=679</i>                       | <i>N=7,127</i>                          |                |
| Total number of recordings, mean ± SD              | 24,979                             | 218,999                                 | -              |
| Number of recordings per user, mean ± SD           | 36.8±77.2                          | 30.8±63.1                               | 0.020          |
| Duration of waveform, s, mean ± SD                 | 20.3±8.3                           | 20.7±9.5                                | 0.334          |
| Heart rate, bpm, mean ± SD                         | 83.3±13.1                          | 80.6±14.1                               | <0.001         |
| <b>Medical conditions</b>                          | <i>N=679</i>                       | <i>N=7,127</i>                          |                |
| No reported medical conditions, n (%)              | 0 (0%)                             | 3,517 (49.3%)                           | <0.001         |
| Diabetes mellitus, n (%)                           | 679 (100%)                         | 0 (0%)                                  | <0.001         |
| Hypertension, n (%)                                | 491 (72.3%)                        | 1,961 (27.5%)                           | <0.001         |
| Hypercholesterolemia, n (%)                        | 442 (65.1%)                        | 1,918 (26.9%)                           | <0.001         |
| Coronary artery disease, n(%)                      | 163 (24.0%)                        | 492 (6.9%)                              | <0.001         |
| Prior MI, n (%)                                    | 94 (13.8%)                         | 207 (2.9%)                              | <0.001         |
| CHF, n (%)                                         | 79 (11.6%)                         | 153 (2.1%)                              | <0.001         |
| PVD, n (%)                                         | 59 (8.6%)                          | 120 (1.6%)                              | <0.001         |
| Prior Stroke, n (%)                                | 74 (10.9%)                         | 215 (3.0%)                              | <0.001         |
| Sleep apnea n (%)                                  | 258 (37.8%)                        | 1,005 (14.1%)                           | <0.001         |

**Supplemental Table 3. Baseline Characteristics of the Contemporary Cohort by Diabetes Status.** Contemporary Cohort sample size was 7,806 individual people. Where data was only

---

available for subgroups of the full cohort, subgroup sample size is denoted by N. Differences in means of continuous variables between 2 groups were compared using the two-sample t-test. Differences in proportions of categorical variables between 2 groups were compared using the Chi-Squared test. Tests of significance were 2 sided. Abbreviations: SD: standard deviation; CAD: Coronary artery disease; CHF: Congestive heart failure; COPD: Chronic obstructive pulmonary disease; HR: Heart rate, MI: Myocardial Infarction; PVD: Peripheral Vascular Disease; s: seconds.

**Supplemental Table 4**

|                                          | <b>With Diabetes<br/>(n = 38)</b> | <b>Without Diabetes<br/>(n = 143)</b> | <b><i>p</i>-value</b> |
|------------------------------------------|-----------------------------------|---------------------------------------|-----------------------|
| Age, years, mean ± SD                    | 65.2±11.8                         | 62.5±15.2                             | 0.320                 |
| <b>Gender</b>                            |                                   |                                       |                       |
| Females, n (%)                           | 16 (42.0%)                        | 50 (34.9%)                            | 0.420                 |
| Males, n (%)                             | 22 (57.9%)                        | 93 (65.0%)                            |                       |
| <b>Waveform data</b>                     |                                   |                                       |                       |
| Heart rate, bpm, mean ± SD               | 0.77±109.0                        | 93.4±101.7                            | 0.330                 |
| Duration of waveform, s,<br>mean ± SD    | 71.8±104.3                        | 97.9±106.3                            | 0.180                 |
| <b>Medical conditions</b>                |                                   |                                       |                       |
| No reported medical<br>conditions, n (%) | 0 (0%)                            | 48 (35.6%)                            | <0.001                |
| Diabetes mellitus, n (%)                 | 38 (100%)                         | 0 (0%)                                | -                     |
| Hypertension, n (%)                      | 29 (76.3%)                        | 70 (49.0%)                            | 0.003                 |
| Hypercholesterolemia, n (%)              | 27 (71.8%)                        | 60 (42.0%)                            | 0.001                 |
| Coronary artery disease, n<br>(%)        | 5 (13.1%)                         | 6 (4.2%)                              | 0.013                 |
| Prior MI, n (%)                          | 5 (13.1%)                         | 6 (4.2%)                              | 0.040                 |
| CHF, n (%)                               | 3 (7.9%)                          | 8 (5.6%)                              | 0.598                 |
| PVD, n (%)                               | 3 (7.9%)                          | 3 (2.1%)                              | 0.295                 |
| Prior Stroke, n (%)                      | 4 (10.5%)                         | 1 (0.7%)                              | 0.007                 |
| Sleep apnea, n (%)                       | 2 (5.3%)                          | 11 (7.7%)                             | 0.931                 |
| <b>Lab work</b>                          | <i>N</i> = 38                     | <i>N</i> = 63                         |                       |
| Glycated hemoglobin (HbA1c)              | 7.5±0.3                           | 5.6±0.4                               | <0.001                |

**Supplemental Table 4. Clinic Cohort characteristics by Diabetes Status.** Clinic Cohort sample size was 181 individual people. Where data was only available for subgroups of the full cohort, subgroup sample size is denoted by N. Differences in means of continuous variables between 2 groups were compared using the two-sample t-test. Differences in proportions of categorical variables between 2 groups were compared using the Chi-Squared test. Tests of significance were 2 sided. Abbreviations: SD: standard deviation; bpm: beats per minute; CAD: Coronary artery disease; CHF: Congestive heart failure; COPD: Chronic obstructive pulmonary disease; HR: Heart rate, MI: Myocardial Infarction; PVD: Peripheral Vascular Disease; HbA1c: glycated hemoglobin %.
